# Supplementary material for: Sulfur–oleyl amine platelet derivatives with liquid crystalline behavior
Source: Royal Society of Chemistry journal article supplement (doi:10.1039/c8ra08325h), 2018-01-01
Supplement: c8ra08325h1.pdf [file c8ra08325h1.pdf]

## Electronic Supplementary Information

### Sulfur-Oleyl Amine Platelet Derivatives with Liquid Crystalline Behavior

Vasileios Tzitzios<sup>\*a, d</sup>, Konstantinos Dimos,<sup>b</sup> Ioannis Lelidis,<sup>c</sup> Nikos K. Boukos,<sup>d</sup>  
Vijay S. Wadi,<sup>a</sup> Georgia Basina,<sup>a</sup> George Nounesis<sup>e</sup> and Saeed M. Alhassan<sup>\*a</sup>

<sup>a</sup> Department of Chemical Engineering, Khalifa University of Science and Technology, Petroleum Institute, P.O. Box 127788, Abu Dhabi, United Arab Emirates

<sup>b</sup> Cambridge Graphene Centre, University of Cambridge, Cambridge CB3 0FA, United Kingdom

<sup>c</sup> Department of Physics, National and Kapodistrian University of Athens, 15784 Athens, Greece

<sup>d</sup> Institute of Nanoscience and Nanotechnology, NCSR Demokritos, 15310, Athens Greece

<sup>e</sup> Biomolecular Physics Laboratory, NCSR “Demokritos,” 15310 Athens, Greece

In the Supporting Information section were presented the detailed synthetic procedure, the optical images of the S-OA platelet derivatives precipitate from the elemental sulfur in oleyl amine solutions, additional XRD, TEM and AFM data as well FT-IR spectroscopy characterization.

500 mg of elemental sulfur (Aldrich, reagent grade) were added in 5 ml of oleyl amine (Aldrich > 98% primary amine) in a 20 ml vial. Elemental sulfur reagent was used as received without any further purification, while oleyl amine was degassed at 120-130 °C with nitrogen for 4 h in order to remove humidity and dissolved oxygen. The sulfur oleyl amine mixture was magnetically stirred overnight at 80-100 °C. Any undissolved material was discarded and the clear dark red solution was stored at room temperature in a dark place until a goldish precipitate was formed. This procedure takes at least 3 months. The precipitate was collected by discarding the supernatant and washed by hexane. The washed S-OA derivative was finally dispersed in hexane or in toluene and stored in a dark place in a vial under nitrogen blanket.

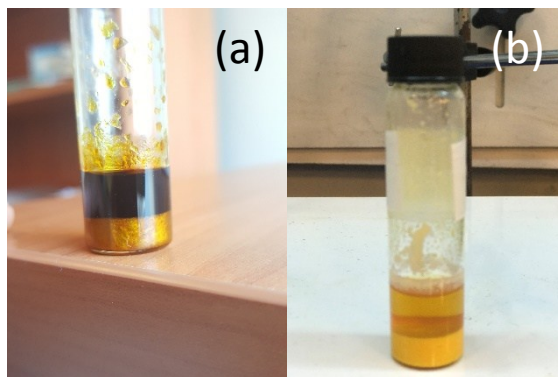

**Figure S1.** Optical images of sulfur-oleyl amine (S-OA) platelet derivative precipitated after 3 months from a concentrated (80 mg/mL) sulfur in oleyl amine solution (a), S-OA in hexane (b).

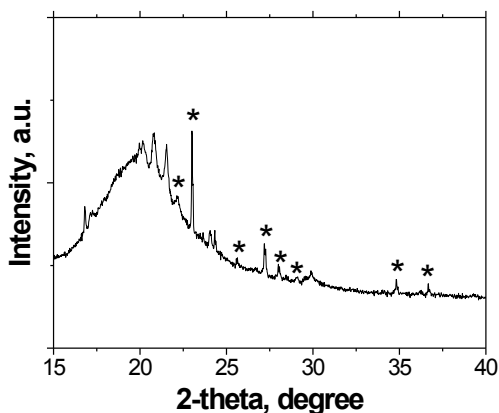

**Figure S2.** XRD pattern of S-OA platelet derivative.

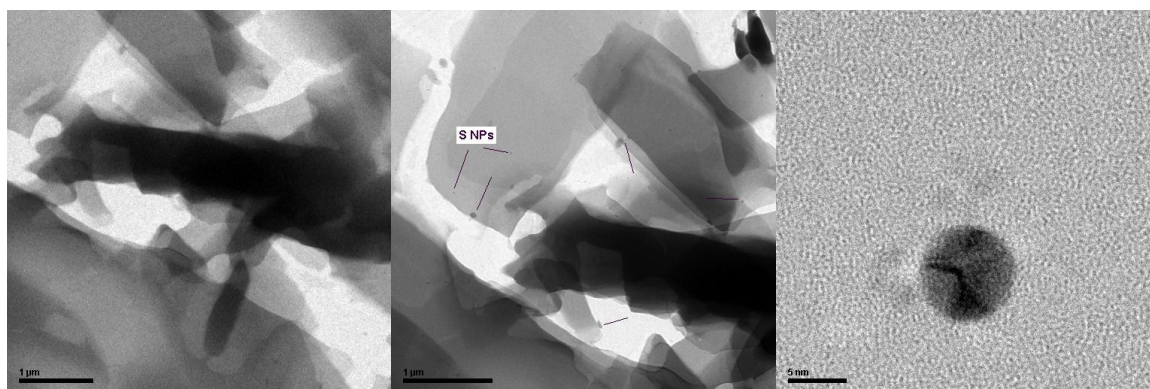

**Figure S3.** TEM images of sulfur-oleyl amine platelet derivative and a sulfur nanoparticle.

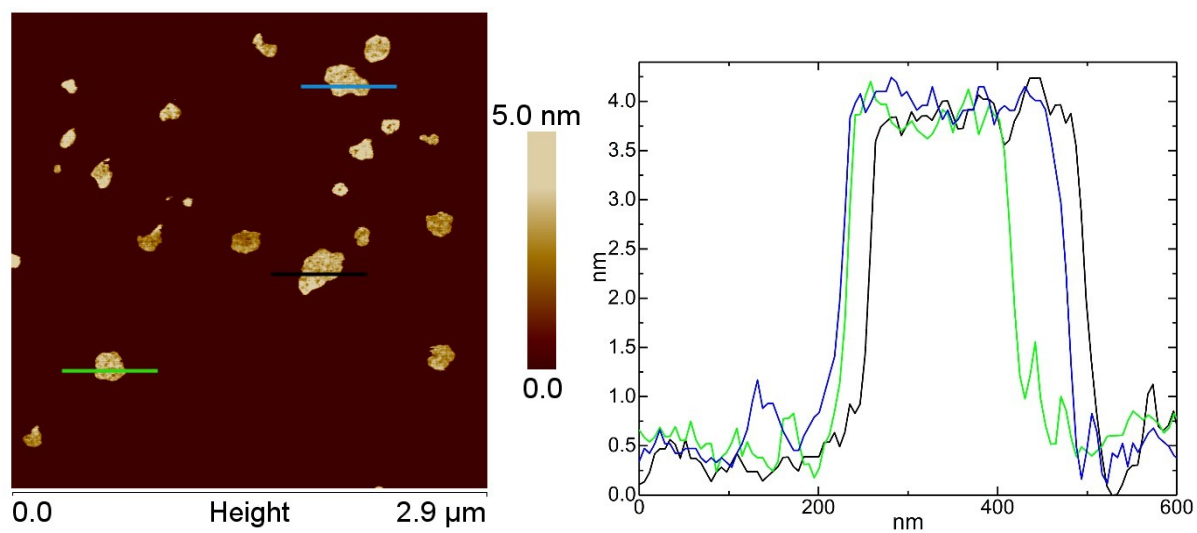

**Figure S4.** AFM height image and corresponding section analysis of sulfur-oleyl amine platelet derivative.

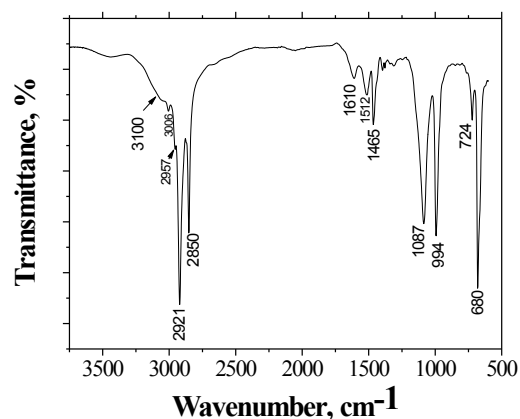

**Figure S5.** FT-IR spectrum of S-OA platelet derivative.

The FT-IR spectrum shows strong absorptions at 2925 and 2855  $\text{cm}^{-1}$  due to the  $-\text{CH}_2-$  stretching absorption (symmetric and asymmetric) of the aliphatic chains, whereas a weak peak at 3006  $\text{cm}^{-1}$  is characteristic of the  $\text{cis-HC=CH-}$  arrangement in the oleyl amine molecule. The broad weak band around 3400  $\text{cm}^{-1}$  arises from the stretching vibration of the  $\text{NH}_2$  group of unbonded, free oleyl amine (probably physisorbed on the surface of the S-OA platelets), while the shifted broad band around 3100  $\text{cm}^{-1}$  indicates that most of the oleyl amine molecules interact via the  $\text{NH}_2$  group.
